# Supplementary material for: Exopolymeric Substances Control Microbial Community Structure and Function by Contributing to both C and Fe Nutrition in Fe-Limited Southern Ocean Provinces
Source: PubMed Central journal article supplement (PMC7763086; doi:10.3390/microorganisms8121980), 2020-12-12
Supplement: microorganisms-08-01980-s001.pdf [file microorganisms-08-01980-s001.pdf]

**Exopolymeric substances control microbial community structure and function by contributing to both C and Fe nutrition in Fe-limited Southern Ocean provinces**

**Sonia Blanco-Ameijeiras<sup>1</sup>, Damien J. E. Cabanes<sup>1</sup>, Rachel N. Cable<sup>2</sup>, Scarlett Trimborn<sup>3,4,\*</sup>, Stéphan Jacquet<sup>5</sup>, Sonja Wiegmann<sup>3</sup>, Christian Völkner<sup>3</sup>, Florian Lelchat<sup>1,6</sup>, Astrid Bracher<sup>3,7</sup>, Melissa B. Duhaime<sup>2</sup> and Christel S. Hassler<sup>1,8</sup>**

<sup>1</sup> Department F.-A. Forel for Environmental and Aquatic Sciences, University of Geneva—Faculty of Science, Boulevard Carl-Vogt 66, 1211 Geneva, Switzerland; sonia@blancoameijeiras.com (S.B.-A.); damien.cabanes@gmail.com (D.J.E.C.); lelchat@leoviridis.fr (F.L. (F.L.)); christel.hassler@epfl.ch (C.S.H.)

<sup>2</sup> Department of Ecology and Evolutionary Biology, University of Michigan, Ann Arbor, MI 48109, USA; cabler@umich.edu (R.N.C.); duhaimem@umich.edu (M.B.D.)

<sup>3</sup> Sections Ecological Chemistry and Physical Oceanography, Alfred Wegener Institute—Helmholtz Centre for Polar and Marine Research, Am Handelshafen 12, 27570 Bremerhaven, Germany; scarlett.trimborn@awi.de (S.T.); sonja.wiegmann@awi.de (S.W.); christian.voelkner@awi.de (C.V.); astrid.bracher@awi.de (A.B.)

<sup>4</sup> Department Marine Botany, University of Bremen, Leobener Strasse NW2-A, Bremen 28359, Germany

<sup>5</sup> INRAE, UMR CARRTEL, Université Savoie Mont-Blanc, 75bis Avenue de Corzent, 74200 Thonon-les-Bains, France ; stephan.jacquet@inrae.fr (S.J.)

<sup>6</sup> Leo Viridis, 245 rue René Descartes, Plouzané 29280, Bretagne, France

<sup>7</sup> Institute of Environmental Physics, University Bremen, Otto-Hahn-Allee 1, 28359 Bremen, Germany

<sup>8</sup> Swiss Polar Institute, Ecole Polytechnique Fédérale de Lausanne, 1015 Lausanne, Switzerland

\* Correspondence: scarlett.trimborn@awi.de; Tel.: +49-4831-1407

**Supplemental information**

**Supplemental Table 1.** Average concentrations of macronutrients and iron (Fe) determined at the end of the 6 days incubation. Values are given with standard deviation ( $n=3$ ).

|                 |                   | NO <sub>3</sub> (μM) |       | NO <sub>2</sub> (μM) |       | NH <sub>4</sub> (μM) |       | PO <sub>4</sub> (μM) |       | SiO <sub>3</sub> (μM) |       | dFe (nM) |       |
|-----------------|-------------------|----------------------|-------|----------------------|-------|----------------------|-------|----------------------|-------|-----------------------|-------|----------|-------|
| Bio 1           | Ctrl              | 26.19                | ±0.38 | 0.28                 | ±0.00 | 0.08                 | ±0.37 | 1.22                 | ±0.02 | 17.59                 | ±0.00 | 0.73     | ±0.14 |
|                 | Fe                | 24.42                | ±0.49 | 0.26                 | ±0.00 | 0.09                 | ±0.34 | 1.13                 | ±0.07 | 16.61                 | ±0.00 | 0.83     | ±0.14 |
|                 | DFB               | 23.82                | ±0.49 | 0.25                 | ±0.00 | 0.00                 | ±0.28 | 1.08                 | ±0.06 | 16.85                 | ±0.00 | 1.50     | ±0.08 |
|                 | GLU               | 24.08                | ±0.04 | 0.27                 | ±0.00 | 0.04                 | ±0.15 | 1.20                 | ±0.02 | 16.64                 | ±0.00 | 0.77     | ±0.10 |
|                 | CAR               | 23.66                | ±0.10 | 0.26                 | ±0.01 | 0.08                 | ±0.14 | 1.23                 | ±0.01 | 16.52                 | ±0.01 | 0.84     | ±0.11 |
|                 | L <sub>6</sub>    | 24.00                | ±0.79 | 0.26                 | ±0.00 | 0.02                 | ±0.29 | 1.09                 | ±0.07 | 16.47                 | ±0.00 | 0.75     | ±0.06 |
|                 | L <sub>6</sub> vd | 24.21                | ±0.12 | 0.26                 | ±0.00 | 0.09                 | ±0.14 | 1.20                 | ±0.04 | 16.36                 | ±0.00 | 0.81     | ±0.11 |
|                 | GLU               | 24.08                | ±0.04 | 0.27                 | ±0.00 | 0.04                 | ±0.15 | 1.20                 | ±0.02 | 16.64                 | ±0.00 | 0.77     | ±0.10 |
|                 | CAR               | 23.66                | ±0.10 | 0.26                 | ±0.01 | 0.08                 | ±0.14 | 1.23                 | ±0.01 | 16.52                 | ±0.01 | 0.84     | ±0.11 |
| L <sub>22</sub> | 24.17             | ±0.06                | 0.27  | ±0.00                | 0.30  | ±0.11                | 1.22  | ±0.01                | 16.79 | ±0.00                 | 1.01  | ±0.20    |       |
| Bio 2           | Ctrl              | 25.06                | ±0.06 | 0.18                 | ±0.00 | 0.01                 | ±0.01 | 1.45                 | ±0.05 | 38.34                 | ±0.56 | 0.49     | ±0.04 |
|                 | Fe                | 24.61                | ±0.08 | 0.13                 | ±0.01 | 0.01                 | ±0.03 | 1.62                 | ±0.02 | 57.40                 | ±0.84 | 0.65     | ±0.07 |
|                 | DFB               | 22.65                | ±3.02 | 0.11                 | ±0.01 | 0.12                 | ±0.01 | 1.40                 | ±0.21 | 52.60                 | ±5.94 | 1.22     | ±0.03 |
|                 | GLU               | 24.58                | ±0.31 | 0.10                 | ±0.01 | 0.17                 | ±0.02 | 1.65                 | ±0.05 | 57.97                 | ±0.48 | 0.73     | ±0.13 |
|                 | CAR               | 25.22                | ±1.01 | 0.12                 | ±0.02 | 0.12                 | ±0.02 | 1.69                 | ±0.09 | 57.59                 | ±1.31 | 0.65     | ±0.02 |
|                 | L <sub>6</sub>    | 24.80                | ±0.45 | 0.11                 | ±0.01 | 0.12                 | ±0.00 | 1.62                 | ±0.04 | 58.69                 | ±0.83 | 0.58     | ±0.05 |
|                 | L <sub>6</sub> vd | 24.82                | ±0.27 | 0.10                 | ±0.01 | 0.16                 | ±0.03 | 1.63                 | ±0.06 | 58.33                 | ±0.75 | 0.58     | ±0.15 |
|                 | L <sub>22</sub>   | 24.56                | ±0.06 | 0.09                 | ±0.01 | 0.11                 | ±0.03 | 1.55                 | ±0.08 | 56.45                 | ±0.78 | 0.81     | ±0.09 |
| Bio 3           | Ctrl              | 24.36                | ±2.43 | 0.23                 | ±0.02 | 0.19                 | ±0.28 | 1.27                 | ±0.07 | 20.41                 | ±1.99 | 0.63     | ±0.27 |
|                 | Fe                | 25.64                | ±0.25 | 0.24                 | ±0.00 | 0.04                 | ±0.01 | 1.29                 | ±0.04 | 21.43                 | ±0.27 | 0.60     | ±0.06 |

|                   |       |       |      |       |      |       |      |       |       |       |      |       |
|-------------------|-------|-------|------|-------|------|-------|------|-------|-------|-------|------|-------|
| DFB               | 25.84 | ±0.37 | 0.24 | ±0.00 | 0.12 | ±0.01 | 1.32 | ±0.05 | 21.60 | ±0.14 | 1.40 | ±0.33 |
| GLU               | 25.57 | ±0.96 | 0.24 | ±0.01 | 0.04 | ±0.04 | 1.31 | ±0.07 | 21.57 | ±0.88 | 0.61 | ±0.06 |
| CAR               | 24.94 | ±0.30 | 0.23 | ±0.00 | 0.03 | ±0.02 | 1.32 | ±0.02 | 21.72 | ±0.89 | 0.69 | ±0.14 |
| L <sub>6</sub>    | 25.78 | ±0.98 | 0.24 | ±0.01 | 0.06 | ±0.02 | 1.34 | ±0.07 | 22.00 | ±0.74 | 0.63 | ±0.13 |
| L <sub>6</sub> vd | 27.05 | ±2.93 | 0.25 | ±0.03 | 0.03 | ±0.01 | 1.41 | ±0.12 | 22.61 | ±1.86 | 0.60 | ±0.09 |
| L <sub>22</sub>   | 25.42 | ±0.33 | 0.23 | ±0.00 | 0.48 | ±0.02 | 1.29 | ±0.04 | 21.28 | ±0.25 | 1.09 | ±0.66 |
| EPS               | 25.44 | ±0.11 | 0.23 | ±0.00 | 0.04 | ±0.03 | 1.28 | ±0.01 | 21.46 | ±0.16 | 0.54 | ±0.13 |

---

Ctrl (control), Fe (inorganic Fe addition, FeCl<sub>3</sub>), DFB (iron complexed to desferrioxamine B), GLU (Fe complexed to glucuronic acid), CAR (Fe complexed to carrageenan), L<sub>6</sub> (Fe complexed to bacterial exopolymeric substance (EPS)), L<sub>6</sub>vd (Fe complexed to virally degraded EPS), L<sub>22</sub> (bacterial EPS) and EPS (in situ EPS isolated from Bio 1).

**Supplemental Table 2.** Evaluation of scaled PLP concentrations using linear mixed models fit by REML. To capture all pairwise station relationships, two models were created with all stations combined: one model with Bio 1 as the reference and a second with Bio 2 as the reference. The reference treatment was the experimental control, treatment and stations were assigned as fixed effects, and analysis group was assigned as random effect. P-values were calculated using the lmer function of the lmerTest package in R. Standard error is the standard error for the modeled intercept. Significance levels are denoted by (p < 0.1), \* (p < 0.05), \*\* (p < 0.01), \*\*\* (p < 0.001). Model variances are reported in Supplemental Table 10.

| Reference Station | Fixed Effect    | Estimate | Std. Error | df       | t value | Pr(> t ) |     |
|-------------------|-----------------|----------|------------|----------|---------|----------|-----|
| Bio 1             | Intercept       | -0.32046 | 0.29453    | 4.52453  | -1.088  | 0.33111  |     |
|                   | Bio 2           | 0.35755  | 0.19109    | 75.12497 | 1.871   | 0.06522  | .   |
|                   | Bio 3           | -0.30223 | 0.19325    | 75.12967 | -1.564  | 0.12204  |     |
| Bio 2             | Intercept       | 0.03709  | 0.29154    | 4.35112  | 0.127   | 0.904433 |     |
|                   | Bio 3           | -0.65978 | 0.17910    | 75.00014 | -3.684  | 0.000431 | *** |
| Bio 1 or 2        | T <sub>0</sub>  | -0.26895 | 0.32417    | 75.90431 | -0.83   | 0.40933  |     |
|                   | Fe              | -0.01405 | 0.28808    | 75.01748 | -0.049  | 0.96124  |     |
|                   | DFB             | -0.06053 | 0.28808    | 75.01748 | -0.21   | 0.83415  |     |
|                   | GLU             | -0.05997 | 0.28808    | 75.01748 | -0.208  | 0.83565  |     |
|                   | CAR             | 0.36047  | 0.30491    | 75.02579 | 1.182   | 0.24085  |     |
|                   | L <sub>6</sub>  | 0.84122  | 0.28808    | 75.01748 | 2.92    | 0.00462  | **  |
|                   | L <sub>22</sub> | 2.02521  | 0.29578    | 75.06686 | 6.847   | 1.79E-09 | *** |
|                   | EPS 1           | 0.05246  | 0.4121     | 75.00347 | 0.127   | 0.89904  |     |

**Supplemental Table 3.** Evaluation of scaled PLP concentrations using linear mixed models fit by REML. One model was created for each station. In all cases, the treatment reference (assigned fixed effect) was the corresponding experimental control and analysis group was assigned as random effect. P-values were calculated using the lmer function of the lmerTest package in R. Estimate is estimated intercept for the reference variable (here, the controls). Standard error is the standard error for the modeled intercept. Significance levels are denoted by (p < 0.1), \* (p < 0.05), \*\* (p < 0.01), \*\*\* (p < 0.001). Model variances are reported in Supplemental Table 10.

| Station | Treatment       | Estimate | Std. Error | df       | t value | Pr(> t ) |     |
|---------|-----------------|----------|------------|----------|---------|----------|-----|
| Bio 1   | Intercept       | -0.5459  | 0.21347    | 9.83593  | -2.557  | 0.02885  | *   |
|         | T <sub>0</sub>  | -0.27751 | 0.36273    | 14.96109 | -0.765  | 0.45614  |     |
|         | Fe              | -0.08221 | 0.31797    | 14.20838 | -0.259  | 0.79969  |     |
|         | DFB             | -0.06885 | 0.31797    | 14.20838 | -0.217  | 0.83165  |     |
|         | GLU             | 0.08615  | 0.31797    | 14.20838 | 0.271   | 0.79034  |     |
|         | CAR             | 0.33005  | 0.36018    | 13.99959 | 0.916   | 0.375    |     |
|         | L <sub>6</sub>  | 1.16385  | 0.31797    | 14.20838 | 3.66    | 0.00252  | **  |
|         | L <sub>22</sub> | 3.04051  | 0.31797    | 14.20838 | 9.562   | 1.43E-07 | *** |
| Bio 2   | Intercept       | 0.11908  | 0.46811    | 8.8154   | 0.254   | 0.805    |     |
|         | T <sub>0</sub>  | -0.42949 | 0.61301    | 22.88885 | -0.701  | 0.4906   |     |
|         | Fe              | -0.03708 | 0.59983    | 22.00002 | -0.062  | 0.9513   |     |
|         | DFB             | 0.14911  | 0.59983    | 22.00002 | 0.249   | 0.806    |     |
|         | GLU             | -0.22919 | 0.59983    | 22.00002 | -0.382  | 0.7061   |     |
|         | CAR             | 0.59922  | 0.59983    | 22.00002 | 0.999   | 0.3287   |     |
|         | L <sub>6</sub>  | 0.70093  | 0.59983    | 22.00002 | 1.169   | 0.2551   |     |
|         | L <sub>22</sub> | 1.20733  | 0.64926    | 22.12401 | 1.86    | 0.0763   | .   |
| Bio 3   | Intercept       | -0.47925 | 0.38204    | 10.50735 | -1.254  | 0.2369   |     |
|         | T <sub>0</sub>  | -0.25986 | 0.61482    | 23.65001 | -0.423  | 0.6764   |     |
|         | Fe              | -0.0334  | 0.49568    | 23       | -0.067  | 0.9469   |     |
|         | DFB             | -0.35744 | 0.49568    | 23       | -0.721  | 0.4781   |     |
|         | GLU             | -0.09386 | 0.49568    | 23       | -0.189  | 0.8515   |     |
|         | CAR             | -0.05797 | 0.53637    | 23.11358 | -0.108  | 0.9149   |     |
|         | L <sub>6</sub>  | 0.64601  | 0.49568    | 23       | 1.303   | 0.2054   |     |
|         | L <sub>22</sub> | 1.79959  | 0.49568    | 23       | 3.631   | 0.0014   | **  |
|         | EPS 1           | -0.09098 | 0.49568    | 23       | -0.184  | 0.856    |     |

**Supplemental Table 4.** Evaluation of scaled PLP inverse Simpson diversities using linear mixed models fit by REML. Model design and table measures are as reported in Supplemental Table 2. Model variances are reported in Supplemental Table 10. Significance levels are denoted by (p < 0.1), \* (p < 0.05), \*\* (p < 0.01), \*\*\* (p < 0.001).

| Reference Station | Fixed Effect    | Estimate | Std. Error | df | t value | Pr(> t ) |     |
|-------------------|-----------------|----------|------------|----|---------|----------|-----|
| Bio 1             | Intercept       | 1.03134  | 0.26747    | 76 | 3.856   | 0.00024  | *** |
|                   | Bio 2           | -0.47607 | 0.22278    | 76 | -2.137  | 0.035818 | *   |
|                   | Bio 3           | -0.78618 | 0.22527    | 76 | -3.49   | 0.000808 | *** |
| Bio 2             | Intercept       | 0.55527  | 0.26311    | 76 | 2.110   | 0.03811  | *   |
|                   | Bio 3           | -0.31011 | 0.20931    | 76 | -1.482  | 0.14258  |     |
| Bio 1 or 2        | T <sub>0</sub>  | -0.24035 | 0.36905    | 76 | -0.651  | 0.516845 |     |
|                   | Fe              | -0.26763 | 0.33655    | 76 | -0.795  | 0.428971 |     |
|                   | DFB             | -0.07709 | 0.33655    | 76 | -0.229  | 0.819438 |     |
|                   | GLU             | -0.5409  | 0.33655    | 76 | -1.607  | 0.112159 |     |
|                   | CAR             | -0.71483 | 0.35616    | 76 | -2.007  | 0.048301 | *   |
|                   | L <sub>6</sub>  | -1.14113 | 0.33655    | 76 | -3.391  | 0.001109 | **  |
|                   | L <sub>22</sub> | -1.82125 | 0.34522    | 76 | -5.276  | 1.21E-06 | *** |
|                   | EPS 1           | -0.04045 | 0.48157    | 76 | -0.084  | 0.933288 |     |

**Supplemental Table 5.** Evaluation of scaled PLP inverse Simpson diversities using linear mixed models fit by REML. Model design and table measures are as reported in Supplemental Table 3. Model variances are reported in Supplemental Table 10. Significance levels are denoted by (p < 0.1), \* (p < 0.05), \*\* (p < 0.01), \*\*\* (p < 0.001).

| Station | Treatment       | Estimate | Std. Error | df       | t value | Pr(> t ) |     |
|---------|-----------------|----------|------------|----------|---------|----------|-----|
| Bio 1   | Intercept       | 1.844    | 0.3816     | 15       | 4.832   | 0.00022  | *** |
|         | T <sub>0</sub>  | -0.5146  | 0.661      | 15       | -0.779  | 0.448331 |     |
|         | Fe              | -0.7521  | 0.5829     | 15       | -1.29   | 0.216493 |     |
|         | DFB             | 0.2603   | 0.5829     | 15       | 0.447   | 0.661593 |     |
|         | GLU             | -1.6807  | 0.5829     | 15       | -2.883  | 0.011375 | *   |
|         | CAR             | -1.6427  | 0.661      | 15       | -2.485  | 0.025227 | *   |
|         | L <sub>6</sub>  | -2.6751  | 0.5829     | 15       | -4.589  | 0.000355 | *** |
|         | L <sub>22</sub> | -4.4292  | 0.5829     | 15       | -7.598  | 1.61E-06 | *** |
| Bio 2   | Intercept       | 0.05843  | 0.35509    | 1.87298  | 0.165   | 0.885    |     |
|         | T <sub>0</sub>  | -0.24793 | 0.29364    | 22.19386 | -0.844  | 0.407    |     |
|         | Fe              | 0.13051  | 0.28386    | 22       | 0.46    | 0.65     |     |
|         | DFB             | -0.08722 | 0.28386    | 22       | -0.307  | 0.762    |     |
|         | GLU             | -0.13537 | 0.28386    | 22       | -0.477  | 0.638    |     |
|         | CAR             | -0.21785 | 0.28386    | 22       | -0.767  | 0.451    |     |
|         | L <sub>6</sub>  | -0.20613 | 0.28386    | 22       | -0.726  | 0.475    |     |
|         | L <sub>22</sub> | -0.11624 | 0.30763    | 22.02045 | -0.378  | 0.709    | .   |
| Bio 3   | Intercept       | -0.07062 | 0.23515    | 24       | -0.3    | 0.76651  |     |
|         | T <sub>0</sub>  | -0.02028 | 0.40729    | 24       | -0.05   | 0.96069  |     |
|         | Fe              | -0.09924 | 0.33255    | 24       | -0.298  | 0.76796  |     |
|         | DFB             | -0.11684 | 0.33255    | 24       | -0.351  | 0.7284   |     |
|         | GLU             | 0.11155  | 0.33255    | 24       | 0.335   | 0.74021  |     |
|         | CAR             | -0.32242 | 0.3592     | 24       | -0.898  | 0.37832  |     |
|         | L <sub>6</sub>  | -0.72252 | 0.33255    | 24       | -2.173  | 0.03991  | *   |
|         | L <sub>22</sub> | -1.13584 | 0.33255    | 24       | -3.416  | 0.00227  | **  |
|         | EPS 1           | 0.27534  | 0.33255    | 24       | 0.828   | 0.41585  |     |

**Supplemental Table 6.** Evaluation of scaled VLP concentrations using linear mixed models fit by REML. Model design and table measures are as reported in Supplemental Table 2. Model variances are reported in Supplemental Table 10. Significance levels are denoted by (p < 0.1), \* (p < 0.05), \*\* (p < 0.01), \*\*\* (p < 0.001).

| Reference Station | Fixed Effect    | Estimate  | Std. Error | df        | t value | Pr(> t ) |     |
|-------------------|-----------------|-----------|------------|-----------|---------|----------|-----|
| Bio 1             | Intercept       | -0.627291 | 0.291623   | 4.161622  | -2.151  | 0.0952   | .   |
|                   | Bio 2           | 1.328914  | 0.185529   | 75.115366 | 7.163   | 4.56E-10 | *** |
|                   | Bio 3           | -0.26428  | 0.187624   | 75.119717 | -1.409  | 0.1631   |     |
| Bio 2             | Intercept       | 0.701623  | 0.288770   | 4.007332  | 2.430   | 0.0719   | .   |
|                   | Bio 3           | -1.593194 | 0.173884   | 75.000128 | -9.162  | 7.32e-14 | *** |
| Bio 1 or 2        | T <sub>0</sub>  | -0.270957 | 0.314836   | 75.866898 | -0.861  | 0.3922   |     |
|                   | Fe              | 0.107165  | 0.279688   | 75.016106 | 0.383   | 0.7027   |     |
|                   | DFB             | -0.004714 | 0.279688   | 75.016106 | -0.017  | 0.9866   |     |
|                   | GLU             | 0.127481  | 0.279688   | 75.016106 | 0.456   | 0.6499   |     |
|                   | CAR             | 0.512018  | 0.296032   | 75.02376  | 1.73    | 0.0878   | .   |
|                   | L <sub>6</sub>  | 0.711635  | 0.279688   | 75.016106 | 2.544   | 0.013    | *   |
|                   | L <sub>22</sub> | 0.484968  | 0.28717    | 75.061653 | 1.689   | 0.0954   | .   |
|                   | EPS 1           | 0.45674   | 0.400096   | 75.003195 | 1.142   | 0.2573   |     |

**Supplemental Table 7.** Evaluation of scaled VLP concentrations using linear mixed models fit by REML. All other measures are as in Supplemental Table 3. Model variances are reported in Supplemental Table 10. Significance levels are denoted by (p < 0.1), \* (p < 0.05), \*\* (p < 0.01), \*\*\* (p < 0.001).

| Station | Treatment       | Estimate  | Std. Error | df        | t value | Pr(> t ) |
|---------|-----------------|-----------|------------|-----------|---------|----------|
| Bio 1   | Intercept       | -0.66267  | 0.37143    | 2.38033   | -1.784  | 0.196    |
|         | T <sub>0</sub>  | 0.2509    | 0.4454     | 14.2519   | 0.563   | 0.582    |
|         | Fe              | 0.13103   | 0.38333    | 14.03968  | 0.342   | 0.738    |
|         | DFB             | -0.04644  | 0.38333    | 14.03968  | -0.121  | 0.905    |
|         | GLU             | 0.4982    | 0.38333    | 14.03968  | 1.3     | 0.215    |
|         | CAR             | 0.45029   | 0.43284    | 14.00002  | 1.04    | 0.316    |
|         | L <sub>6</sub>  | 0.53698   | 0.38333    | 14.03968  | 1.401   | 0.183    |
|         | L <sub>22</sub> | 0.08707   | 0.38333    | 14.03968  | 0.227   | 0.824    |
| Bio 2   | Intercept       | 0.58787   | 0.43624    | 23        | 1.348   | 0.1909   |
|         | T <sub>0</sub>  | -0.60694  | 0.61694    | 23        | -0.984  | 0.3355   |
|         | Fe              | 0.15968   | 0.61694    | 23        | 0.259   | 0.7981   |
|         | DFB             | 0.32198   | 0.61694    | 23        | 0.522   | 0.6067   |
|         | GLU             | -0.08002  | 0.61694    | 23        | -0.13   | 0.8979   |
|         | CAR             | 0.76764   | 0.61694    | 23        | 1.244   | 0.2259   |
|         | L <sub>6</sub>  | 1.2374    | 0.61694    | 23        | 2.006   | 0.0568   |
|         | L <sub>22</sub> | 1.12919   | 0.66638    | 23        | 1.695   | 0.1037   |
| Bio 3   | Intercept       | -0.74244  | 0.315472   | 4.74112   | -2.353  | 0.0681   |
|         | T <sub>0</sub>  | 0.268035  | 0.444406   | 23.332714 | 0.603   | 0.5522   |
|         | Fe              | 0.008172  | 0.356612   | 22.99997  | 0.023   | 0.9819   |
|         | DFB             | -0.328701 | 0.356612   | 22.99997  | -0.922  | 0.3662   |
|         | GLU             | 0.028362  | 0.356612   | 22.99997  | 0.08    | 0.9373   |
|         | CAR             | 0.239831  | 0.386155   | 23.052655 | 0.621   | 0.5406   |
|         | L <sub>6</sub>  | 0.288277  | 0.356612   | 22.99997  | 0.808   | 0.4272   |
|         | L <sub>22</sub> | 0.286956  | 0.356612   | 22.99997  | 0.805   | 0.4292   |
|         | EPS 1           | 0.30761   | 0.356612   | 22.99997  | 0.863   | 0.3973   |

**Supplemental Table 8.** Evaluation of scaled VLP inverse Simpson diversities using linear mixed models fit by REML. Model design and table measures are as reported in Supplemental Table 2. Model variances are reported in Supplemental Table 10. Significance levels are denoted by (p < 0.1), \* (p < 0.05), \*\* (p < 0.01), \*\*\* (p < 0.001).

| Reference Station | Fixed Effect    | Estimate | Std. Error | df      | t value | Pr(> t ) |     |
|-------------------|-----------------|----------|------------|---------|---------|----------|-----|
| Bio 1             | Intercept       | 1.1441   | 0.4721     | 1.6887  | 2.424   | 0.158958 |     |
|                   | Bio 2           | -1.269   | 0.2014     | 75.0335 | -6.3    | 1.85E-08 | *** |
|                   | Bio 3           | -0.9106  | 0.2037     | 75.0348 | -4.47   | 2.73E-05 | *** |
| Bio 2             | Intercept       | -0.1249  | 0.4700     | 1.6594  | -0.266  | 0.819694 |     |
|                   | Bio 3           | 0.3584   | 0.1887     | 75.0000 | 1.899   | 0.061437 | .   |
| Bio 1 or 2        | T <sub>0</sub>  | 0.2687   | 0.3428     | 75.325  | 0.784   | 0.435475 |     |
|                   | Fe              | -0.3106  | 0.3036     | 75.0046 | -1.023  | 0.309575 |     |
|                   | DFB             | -0.2494  | 0.3036     | 75.0046 | -0.822  | 0.4139   |     |
|                   | GLU             | 0.237    | 0.3036     | 75.0046 | 0.781   | 0.437432 |     |
|                   | CAR             | -0.5604  | 0.3213     | 75.0068 | -1.744  | 0.085248 | .   |
|                   | L <sub>6</sub>  | -1.0967  | 0.3036     | 75.0046 | -3.612  | 0.000546 | *** |
|                   | L <sub>22</sub> | -0.5401  | 0.3118     | 75.0177 | -1.732  | 0.087327 | .   |
|                   | EPS 1           | -0.0677  | 0.4343     | 75.0009 | -0.156  | 0.876532 |     |

**Supplemental Table 9.** Evaluation of scaled VLP inverse Simpson diversities using linear mixed models fit by REML. Model design and table measures are as reported in Supplemental Table 3. Model variances are reported in Supplemental Table 10. Significance levels are denoted by (p < 0.1), \* (p < 0.05), \*\* (p < 0.01), \*\*\* (p < 0.001).

| Station | Treatment       | Estimate | Std. Error | df       | t value | Pr(> t ) |     |
|---------|-----------------|----------|------------|----------|---------|----------|-----|
| Bio 1   | Intercept       | 1.7846   | 0.4808     | 3.0896   | 3.712   | 0.032335 | *   |
|         | T <sub>0</sub>  | -0.4703  | 0.6395     | 14.3505  | -0.735  | 0.47397  |     |
|         | Fe              | -1.1299  | 0.5514     | 14.0563  | -2.049  | 0.059568 | .   |
|         | DFB             | -0.4253  | 0.5514     | 14.0563  | -0.771  | 0.453273 |     |
|         | GLU             | -0.9677  | 0.5514     | 14.0563  | -1.755  | 0.101012 |     |
|         | CAR             | -1.112   | 0.6228     | 14       | -1.786  | 0.095823 | .   |
|         | L <sub>6</sub>  | -2.5055  | 0.5514     | 14.0563  | -4.544  | 0.000454 | *** |
|         | L <sub>22</sub> | -1.2467  | 0.5514     | 14.0563  | -2.261  | 0.040136 | *   |
| Bio 2   | Intercept       | 1.11748  | 0.48313    | 22.2417  | 2.313   | 0.0303   | *   |
|         | T <sub>0</sub>  | 0.59772  | 0.46733    | 22       | 1.279   | 0.2142   |     |
|         | Fe              | 0.35938  | 0.46733    | 22       | 0.769   | 0.4501   |     |
|         | DFB             | 1.17263  | 0.46733    | 22       | 2.509   | 0.02     | *   |
|         | GLU             | 0.24858  | 0.46733    | 22       | 0.532   | 0.6001   |     |
|         | CAR             | 0.14584  | 0.46733    | 22       | 0.312   | 0.7579   |     |
|         | L <sub>6</sub>  | -0.01807 | 0.50643    | 22.02577 | -0.036  | 0.9719   |     |
|         | L <sub>22</sub> | -0.86455 | 0.5387     | 2.14012  | -1.605  | 0.2417   |     |
| Bio 3   | Intercept       | 0.3326   | 0.5199     | 3.3665   | 0.64    | 0.5633   |     |
|         | T <sub>0</sub>  | -0.11    | 0.6698     | 23.236   | -0.164  | 0.871    |     |
|         | Fe              | -0.4726  | 0.5368     | 23       | -0.88   | 0.3877   |     |
|         | DFB             | -0.5946  | 0.5368     | 23       | -1.108  | 0.2795   |     |
|         | GLU             | 0.3367   | 0.5368     | 23       | 0.627   | 0.5367   |     |
|         | CAR             | -0.8334  | 0.5814     | 23.0366  | -1.433  | 0.1652   |     |
|         | L <sub>6</sub>  | -1.151   | 0.5368     | 23       | -2.144  | 0.0428   | *   |
|         | L <sub>22</sub> | -0.4523  | 0.5368     | 23       | -0.842  | 0.4082   |     |
|         | EPS 1           | -0.1668  | 0.5368     | 23       | -0.311  | 0.7588   |     |

**Supplemental Table 10.** Summary of variance analysis for all linear mixed models.

| <b>Data</b>                   | <b>Model Set</b> | <b>Variance due to Analysis Group</b> | <b>Residual Variance</b> | <b>Percent Residual Variance due to Analysis Group</b> |
|-------------------------------|------------------|---------------------------------------|--------------------------|--------------------------------------------------------|
| PLP Concentration             | Bio 1            | 0.0047                                | 0.1730                   | 2.7%                                                   |
|                               | Bio 2            | 0.0785                                | 0.7196                   | 10.9%                                                  |
|                               | Bio 3            | 0.0462                                | 0.4914                   | 9.4%                                                   |
|                               | All stations     | 0.0686                                | 0.4754                   | 14.4%                                                  |
| PLP Inverse Simpson Diversity | Bio 1            | 0.0000                                | 0.5825                   | 0.0%                                                   |
|                               | Bio 2            | 0.1716                                | 0.1612                   | 106.4%                                                 |
|                               | Bio 3            | 0.0000                                | 0.2212                   | 0.0%                                                   |
|                               | All stations     | 0.0000                                | 0.6492                   | 0.0%                                                   |
| VLP Concentration             | Bio 1            | 0.1510                                | 0.2498                   | 60.4%                                                  |
|                               | Bio 2            | 0.0000                                | 0.7612                   | 0.0%                                                   |
|                               | Bio 3            | 0.0719                                | 0.2543                   | 28.3%                                                  |
|                               | All stations     | 0.0712                                | 0.4481                   | 15.9%                                                  |
| VLP Inverse Simpson Diversity | Bio 1            | 0.2037                                | 0.5171                   | 39.4%                                                  |
|                               | Bio 2            | 0.3620                                | 0.4368                   | 82.9%                                                  |
|                               | Bio 3            | 0.2523                                | 0.5764                   | 43.8%                                                  |
|                               | All stations     | 0.3291                                | 0.5279                   | 62.3%                                                  |

**Supplemental Table 11.** Raw data for all the parameters studied. Average values with standard deviation ( $n=3-4$ ) are given.

|              | L     |       | log K <sup>+</sup> Fe <sup>+</sup> L |       | Fe <sup>+</sup> | Felabile | Feupt L |                                      | Feupt S |       | POC prod L                           |       | POC prod S           |       | PLP                  |           | PLP Inv. Simpson Div. |       | VLP       |           | VLP Inv. Simpson Div. |       |      |     |  |
|--------------|-------|-------|--------------------------------------|-------|-----------------|----------|---------|--------------------------------------|---------|-------|--------------------------------------|-------|----------------------|-------|----------------------|-----------|-----------------------|-------|-----------|-----------|-----------------------|-------|------|-----|--|
|              | nM    | Error | Error                                | Error | nM              | nM       | pM Fe   | μmol C <sup>-1</sup> d <sup>-1</sup> | STD     | pM Fe | μmol C <sup>-1</sup> d <sup>-1</sup> | STD   | μM C d <sup>-1</sup> | STD   | μM C d <sup>-1</sup> | STD       | PLP mL <sup>-1</sup>  | STD   | mean      | STD       | VLP mL <sup>-1</sup>  | STD   | mean | STD |  |
| <b>BIO 1</b> |       |       |                                      |       |                 |          |         |                                      |         |       |                                      |       |                      |       |                      |           |                       |       |           |           |                       |       |      |     |  |
| Cont         | 1.67  | 0.03  | 11.74                                | 0.02  | 1.45E-03        | 2.80E-02 | 2.416   | 0.246                                | 4.015   | 0.622 | -0.106                               | 0.176 | 0.377                | 0.137 | 578171.7             | 55995.9   | 1017.3                | 144.5 | 2208002.3 | 877814.0  | 3342.4                | 236.4 |      |     |  |
| Fe           | 1.97  | 0.02  | 11.84                                | 0.16  | 1.10E-02        | 2.16E-01 | 14.236  | 0.032                                | 14.257  | 0.466 | 0.238                                | 0.172 | 0.712                | 0.386 | 540035.7             | 103720.5  | 933.4                 | 64.0  | 2469761.5 | 1301231.5 | 3060.3                | 155.8 |      |     |  |
| DFB          | 12.50 | 1.29  | 12.90                                | 0.89  | 2.50E-04        |          | 0.343   | 0.127                                | 0.769   | 0.270 | 0.039                                | 0.096 | 0.078                | 0.084 | 545727.3             | 7753.5    | 1046.3                | 103.3 | 2254372.2 | 694980.4  | 3222.6                | 231.7 |      |     |  |
| GLU          | 1.79  | 0.18  | 11.72                                | 0.11  | 1.67E-02        | 1.89E-01 | 16.153  | 1.005                                | 16.203  | 0.097 | 0.069                                | 0.673 | 0.232                | 0.083 | 611759.2             | 129976.3  | 829.8                 | 79.6  | 2915405.4 | 159686.0  | 3097.7                | 313.6 |      |     |  |
| CAR          |       |       |                                      |       |                 |          | 27.256  | 1.845                                | 32.336  | 3.025 | 0.733                                | 0.156 | 0.315                | 0.079 | 718776.8             | 41942.4   | 834.0                 | 49.4  | 2754528.0 | 399555.0  | 3086.2                | 188.6 |      |     |  |
| L6           | 4.08  | 0.16  | 11.80                                | 0.28  | 7.43E-03        | 1.19E-01 | 18.276  | 1.144                                | 24.090  | 2.771 | 0.581                                | 0.281 | 1.805                | 0.106 | 1070873.0            | 234524.2  | 718.8                 | 69.8  | 2962476.2 | 390814.4  | 2743.4                | 175.6 |      |     |  |
| L22          | 2.06  | 0.01  | 11.61                                | 0.05  | 9.38E-03        | 1.42E-01 | 19.760  | 1.598                                | 16.289  | 0.332 | -0.138                               | 0.118 | 1.527                | 0.549 | 1870349.2            | 388888.7  | 523.1                 | 44.6  | 2416412.7 | 134910.7  | 3033.4                | 207.1 |      |     |  |
| <b>BIO 2</b> |       |       |                                      |       |                 |          |         |                                      |         |       |                                      |       |                      |       |                      |           |                       |       |           |           |                       |       |      |     |  |
| Cont         | 1.12  | 0.10  | 11.52                                | 0.13  | 1.04E-03        | 2.10E-02 | 0.195   | 0.023                                | 0.878   | 0.034 | 0.866                                | 0.423 | 1.232                | 0.139 | 861464.6             | 118171.7  | 818.1                 | 56.4  | 3725805.4 | 305854.6  | 2732.1                | 205.7 |      |     |  |
| Fe           | 1.28  | 0.10  | 11.85                                | 0.32  | 1.08E-02        | 2.01E-01 | 2.728   | 0.536                                | 4.454   | 0.527 | 1.148                                | 0.096 | 1.296                | 0.076 | 845669.2             | 83377.3   | 832.6                 | 70.9  | 3919612.8 | 1112991.8 | 2869.8                | 222.7 |      |     |  |
| DFB          | 13.30 | 0.23  | 13.33                                | 0.38  | 1.20E-04        |          | 0.160   | 0.050                                | 0.138   | 0.059 | 0.335                                | 0.313 | 1.487                | 0.317 | 924985.5             | 257330.7  | 808.3                 | 51.5  | 4116602.5 | 891829.9  | 2814.9                | 255.0 |      |     |  |
| GLU          | 1.97  | 0.04  | 12.11                                | 0.14  | 3.35E-03        | 5.90E-02 | 3.112   | 0.076                                | 6.118   | 0.160 | 0.757                                | 0.264 | 1.658                | 0.078 | 763827.2             | 292207.7  | 803.0                 | 76.2  | 3628684.0 | 1842750.0 | 3002.3                | 293.8 |      |     |  |
| CAR          |       |       |                                      |       |                 |          | 1.288   | 0.234                                | 2.498   | 0.109 | 0.177                                | 0.147 | 1.340                | 0.155 | 1116740.6            | 307453.9  | 793.7                 | 61.6  | 4657500.6 | 828187.9  | 2789.4                | 206.7 |      |     |  |
| L6           | 3.21  | 0.08  | 12.57                                | 0.44  | 2.48E-03        | 4.30E-02 | 3.923   | 0.687                                | 8.544   | 0.240 | 0.394                                | 1.063 | 4.729                | 0.195 | 1160069.5            | 335260.5  | 795.1                 | 60.6  | 5227656.3 | 1202165.0 | 2765.7                | 206.9 |      |     |  |
| L22          | 2.07  | 0.12  | 11.99                                | 0.29  | 1.52E-03        | 6.80E-02 | 3.664   | 0.652                                | 2.042   | 1.709 | 0.873                                | 0.102 | 1.690                | 0.077 | 1354154.5            | 1009264.6 | 815.6                 | 116.2 | 5096312.5 | 1185214.1 | 2696.7                | 323.5 |      |     |  |
| <b>BIO 3</b> |       |       |                                      |       |                 |          |         |                                      |         |       |                                      |       |                      |       |                      |           |                       |       |           |           |                       |       |      |     |  |
| Cont         | 1.59  | 0.06  | 11.29                                | 0.02  | 5.71E-03        | 6.30E-02 | 9.988   | 0.795                                | 3.345   | 0.059 | -0.009                               | 0.095 | 0.037                | 0.098 | 606568.4             | 46958.4   | 803.7                 | 62.6  | 2111186.2 | 972594.2  | 3007.9                | 232.9 |      |     |  |
| Fe           | 2.27  | 0.09  | 11.80                                | 0.08  | 1.38E-02        | 2.78E-01 | 26.671  | 1.870                                | 7.912   | 0.382 | 0.140                                | 0.107 | 0.153                | 0.092 | 592337.6             | 143653.3  | 792.6                 | 52.3  | 2121105.2 | 1038641.2 | 2899.0                | 204.8 |      |     |  |
| DFB          | 13.30 | 0.21  | 12.67                                | 0.23  | 3.30E-04        |          | 1.931   | 0.297                                | 0.914   | 0.200 | -0.117                               | 0.108 | 0.027                | 0.087 | 454294.8             | 40578.5   | 790.6                 | 82.8  | 1712238.3 | 667392.4  | 2870.9                | 205.0 |      |     |  |
| GLU          | 1.83  | 0.03  | 11.50                                | 0.06  | 1.34E-02        | 1.73E-01 | 31.929  | 1.136                                | 8.155   | 0.175 | 0.133                                | 0.112 | 0.044                | 0.099 | 566582.4             | 92304.9   | 816.1                 | 56.7  | 2145609.3 | 174101.3  | 3085.5                | 243.7 |      |     |  |
| CAR          |       |       |                                      |       |                 |          | 27.345  | 0.285                                | 8.479   | 0.194 | 0.024                                | 0.119 | 0.177                | 0.088 | 565285.3             | 62940.9   | 767.7                 | 67.2  | 2471404.1 | 345125.9  | 2790.5                | 310.1 |      |     |  |
| L6           | 3.94  | 0.09  | 11.70                                | 0.26  | 1.11E-02        | 1.45E-01 | 36.840  | 1.461                                | 12.941  | 0.669 | 0.758                                | 0.104 | 1.463                | 0.109 | 881776.7             | 308262.1  | 723.0                 | 71.3  | 2461071.2 | 82144.6   | 2742.8                | 210.5 |      |     |  |
| L22          | 1.97  | 0.03  | 11.79                                | 0.10  | 1.86E-01        |          | 43.189  | 0.984                                | 6.095   | 0.293 | 0.217                                | 0.104 | 0.304                | 0.081 | 1373213.6            | 786188.6  | 676.9                 | 67.1  | 2459468.2 | 861630.6  | 2903.7                | 259.4 |      |     |  |
| EPS in situ  |       |       |                                      |       |                 |          | 10.037  | 3.020                                | 7.708   | 0.066 | -0.003                               | 0.107 | 0.225                | 0.093 | 567810.2             | 86368.2   | 834.4                 | 53.4  | 2484536.4 | 424373.9  | 2969.5                | 204.9 |      |     |  |

**Supplemental Table 12.** Pearson product moment correlation amongst parameters measured. Data were obtained from Supp. Table 10 using Sigma Plot (version 14.0). The top number is the coefficient of correlation, the middle number is the p value and the bottom number is the number of observations. For significant correlations (at level of 95%), p values are shown in red.

|                                                       | UptL                    | UptS                   | ProdL                  | ProdS                 | PLP                    | PLPDiv                   | VLP                      | VLPDiv                  |
|-------------------------------------------------------|-------------------------|------------------------|------------------------|-----------------------|------------------------|--------------------------|--------------------------|-------------------------|
| L<br>(nM)                                             | -0.341<br>0.166<br>18   | -0.367<br>0.134<br>18  | -0.275<br>0.269<br>18  | -0.114<br>0.651<br>18 | -0.23<br>0.359<br>18   | 0.217<br>0.388<br>18     | -0.115<br>0.649<br>18    | -0.014<br>0.956<br>18   |
| log K <sub>ret</sub>                                  | -0.477<br>0.0453<br>18  | -0.396<br>0.104<br>18  | -0.0685<br>0.787<br>18 | 0.25<br>0.317<br>18   | -0.0832<br>0.743<br>18 | 0.272<br>0.275<br>18     | 0.296<br>0.232<br>18     | -0.0904<br>0.721<br>18  |
| Fe <sup>2+</sup><br>(nM)                              | 0.779<br>0.000229<br>17 | 0.639<br>0.00579<br>17 | -0.0457<br>0.862<br>17 | -0.245<br>0.344<br>17 | -0.0772<br>0.768<br>17 | -0.283<br>0.272<br>17    | -0.323<br>0.206<br>17    | 0.117<br>0.654<br>17    |
| Fe <sub>labile</sub><br>(nM)                          | 0.61<br>0.0158<br>15    | 0.368<br>0.177<br>15   | -0.156<br>0.579<br>15  | -0.426<br>0.113<br>15 | -0.141<br>0.617<br>15  | -0.169<br>0.547<br>15    | -0.439<br>0.102<br>15    | 0.0799<br>0.777<br>15   |
| UptL<br>(pM Fe μmol C <sup>-1</sup> d <sup>-1</sup> ) |                         | 0.514<br>0.0145<br>22  | -0.0842<br>0.71<br>22  | -0.28<br>0.207<br>22  | 0.106<br>0.64<br>22    | -0.459<br>0.0317<br>22   | -0.472<br>0.0266<br>22   | -0.0142<br>0.95<br>22   |
| UptS<br>(pM Fe μmol C <sup>-1</sup> d <sup>-1</sup> ) |                         |                        | 0.127<br>0.572<br>22   | 0.0292<br>0.897<br>22 | 0.107<br>0.635<br>22   | -0.274<br>0.218<br>22    | -0.197<br>0.38<br>22     | 0.124<br>0.582<br>22    |
| ProdL<br>(μmol C <sup>-1</sup> d <sup>-1</sup> )      |                         |                        |                        | 0.415<br>0.0551<br>22 | 0.19<br>0.397<br>22    | -0.0413<br>0.855<br>22   | 0.563<br>0.00633<br>22   | -0.483<br>0.0229<br>22  |
| ProdS<br>(μmol C <sup>-1</sup> d <sup>-1</sup> )      |                         |                        |                        |                       | 0.539<br>0.00964<br>22 | -0.249<br>0.263<br>22    | 0.764<br>0.0000353<br>22 | -0.493<br>0.0197<br>22  |
| PLP<br>(mL <sup>-1</sup> )                            |                         |                        |                        |                       |                        | -0.694<br>0.000343<br>22 | 0.453<br>0.0341<br>22    | -0.375<br>0.0856<br>22  |
| PLPDiv                                                |                         |                        |                        |                       |                        |                          | -0.0442<br>0.845<br>22   | 0.507<br>0.0161<br>22   |
| VLP<br>(mL <sup>-1</sup> )                            |                         |                        |                        |                       |                        |                          |                          | -0.544<br>0.00879<br>22 |
